# Supplementary material
Source: PubMed Central journal article supplement (PMC5988210)
Supplement: NIHMS968192-supplement-Supplemental_Table.pdf [file NIHMS968192-supplement-Supplemental_Table.pdf]

Supplemental Table 1: Experiment Words

| <b>Low Density,<br/>Low Phonotactic</b> |        | <b>Low Density,<br/>High Phonotactic</b> |         | <b>High Density<br/>Low Phonotactic</b> |        | <b>High Density<br/>High Phonotactic</b> |        |
|-----------------------------------------|--------|------------------------------------------|---------|-----------------------------------------|--------|------------------------------------------|--------|
| beeps                                   | junk   | blush                                    | sleeve  | bags                                    | popped | brig                                     | grill  |
| blob                                    | mute   | churned                                  | sludge  | belch                                   | roamed | brim                                     | hoots  |
| bribe                                   | pledge | cliff                                    | smug    | block                                   | shield | clan                                     | jarred |
| crawl                                   | quiz   | clutch                                   | snug    | blot                                    | slash  | crass                                    | lids   |
| crouch                                  | shelf  | crib                                     | tenth   | brook                                   | slop   | crate                                    | meld   |
| cube                                    | sniff  | daunt                                    | thumbed | broom                                   | snack  | creep                                    | scare  |
| curved                                  | spoil  | gleam                                    | torch   | clot                                    | sneak  | dared                                    | slate  |
| cute                                    | spoon  | plush                                    | trash   | float                                   | spice  | dipped                                   | spear  |
| flag                                    | swim   | probe                                    | trot    | flock                                   | spike  | dunk                                     | spill  |
| frog                                    | thirds | prune                                    | trout   | fright                                  | swell  | fond                                     | tread  |
| groove                                  | vault  | realm                                    | tuned   | hurled                                  | tank   | freak                                    | truce  |
| jammed                                  | verbs  | reefs                                    | zoned   | lagged                                  | yank   | gram                                     | vex    |
| jolt                                    |        | scotch                                   |         | muse                                    |        | greet                                    |        |

Supplemental Table 2: Experiment Pseudowords

| Low Density,<br>Low Phonotactic |        | Low Density,<br>High Phonotactic |       | High Density<br>Low Phonotactic |        | High Density<br>High Phonotactic |        |
|---------------------------------|--------|----------------------------------|-------|---------------------------------|--------|----------------------------------|--------|
| blɛdʒ                           | gɪaʊd  | blɑɪ                             | kleɪf | bɑɪld                           | fɪuz   | bɒɪl                             | ʃɪks   |
| blɜːdʒ                          | gwɪl   | blɪb                             | lændʒ | bɛldʒ                           | gæŋk   | bɑɪm                             | kɑɪdʒ  |
| blɛɪv                           | hɒsk   | blɪf                             | lɛɪs  | bɛlf                            | gɜːld  | bɛɪt                             | kɒɪdʒ  |
| bɒntʃ                           | hɑɪntʃ | blʌg                             | lɪlf  | bɛlp                            | gɪld   | blɪn                             | kɑɪv   |
| bɪaʊb                           | hɛɪndʒ | blʌŋ                             | plɪm  | bɜːntʃ                          | glɛɪn  | blɪt                             | kɪɛk   |
| bɪɒm                            | ʃæmp   | bɪɛp                             | plʌtʃ | blɒd                            | glɒn   | bɪæb                             | kɪɛm   |
| dɒnk                            | kleɪg  | dɑɪns                            | pɪɛk  | blæd                            | gɪaʊn  | bɪæp                             | mɑnt   |
| dɛldʒ                           | læls   | dɛnθ                             | pɪɪb  | blɜːk                           | gɪus   | bʊnd                             | mɒɪn   |
| dɪɑɪdʒ                          | leɪntʃ | dɪɪn                             | pɪɒs  | blʊd                            | ʃɪɪd   | dɛɪnd                            | mæntʃ  |
| dɪɛɪm                           | mɑɪsk  | flɪv                             | pɪul  | blʊk                            | kɑɪld  | flɛɪt                            | mɪnd   |
| ʃɒmp                            | mɛɪldʒ | flʌv                             | ɪɪlf  | bɪaʊk                           | kɒldʒ  | flɪd                             | nɪld   |
| ʃɪɛɪl                           | mʃudʒ  | fɪɪp                             | ɪɪsp  | bɪʊf                            | læmd   | flɪn                             | plɪk   |
| fælt                            | mɒɪd   | gɑɪb                             | sleɪf | bɪʊp                            | nɒps   | fɪæk                             | pɪæk   |
| fɛɪndʒ                          | plɒdʒ  | gɑɪm                             | sunt  | bɪʊv                            | pæŋk   | fɪɪm                             | pɪɑɪt  |
| flɒb                            | ɪɑɪls  | gɑɪtʃ                            | tɪmp  | bɪʊθ                            | pɛɪndʒ | gɒɪk                             | pɪɛd   |
| fɪɑɪb                           | sɑɪft  | gɑɪnt                            | tunt  | ʃɛɪld                           | ploz   | gɪks                             | pʌks   |
| fɪɑɪv                           | sɪlk   | gɪntʃ                            | tʃɑɪm | ʃɪɛɪn                           | slaut  | glɪd                             | ɪɒɪd   |
| fɪʊm                            | skɛɪdʒ | glɛɪt                            | tʃɪnd | fæŋk                            | tʃæŋk  | gɪæf                             | ɪɪlt   |
| gɪɪt                            | tælt   | glɪp                             | wɜːns | fɪlk                            | tʃɪld  | gɪæk                             | sɜːnd  |
| glɑɪm                           | tʃɪɪt  | glɪs                             | wɛnθ  | flok                            | wæŋk   | gɪɛd                             | swɛɪt  |
| glɑɪt                           | vælp   | glʌf                             | wɪns  | flud                            | wɪltʃ  | gɪɛt                             | tɪɛk   |
| glɛdʒ                           | wɑɪsp  | glʌŋ                             | θɪntʃ | fɪɛk                            | wɪlθ   | gɪɛk                             | tɪɛp   |
| glɛɪl                           | wɛɪt   | hɛnθ                             | θɪɛk  | fɪɒd                            | wuld   | gɪɪb                             | tʃɑɪnd |
| glok                            | wɪsp   | hɪsp                             | θɪɪm  | fɪɒn                            | θɪɒd   | hɑɪθ                             | wɑɪtʃ  |
| gɪɑɪb                           | θɪɛs   | ʃɑɪm                             | θɪʌg  | fɪʊd                            | θʌŋk   | ʃɛks                             | wʌks   |
